# Supplementary material
Source: publisher figshare collection journal article supplement (https://frontiersin.figshare.com/ndownloader/files/27681690)
Supplement: Supplementary file [file 27681690]

# **Sequencing of the Canine Cytochrome P450 CYP2C41 Gene and Genotyping of Its Polymorphic Occurrence in 36 Dog Breeds**

**Emre Karakus<sup>†</sup>, Clarissa Prinzing<sup>†</sup>, Silke Leiting, Joachim Geyer<sup>\*</sup>**

Institute of Pharmacology and Toxicology, Faculty of Veterinary Medicine, Justus Liebig University Giessen, Schubertstr. 81, 35392 Giessen, Giessen, Germany

<sup>†</sup>These authors contributed equally to this work and share first authorship

<sup>\*</sup>Correspondence to [Joachim.M.Geyer@vetmed.uni-giessen.de](mailto:Joachim.M.Geyer@vetmed.uni-giessen.de)

## **Supplementary Figures 1 and 2**

(A) CYP2C41 positive dogs: SOR1

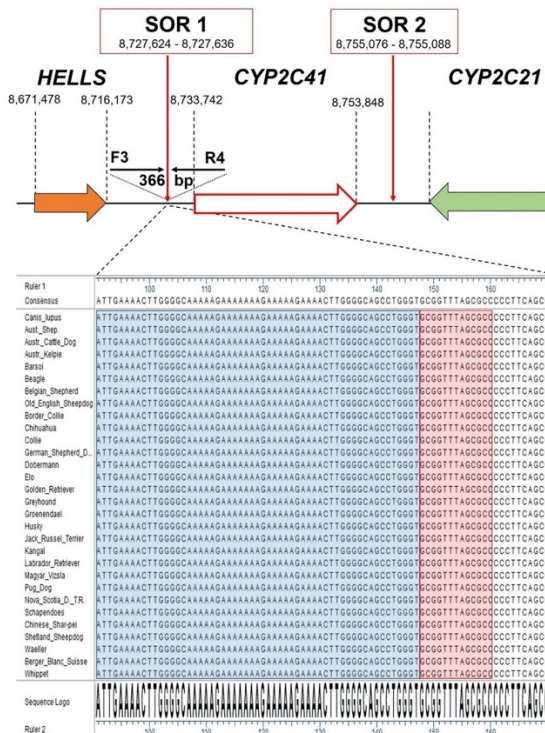

(B) CYP2C41 positive dogs: SOR2

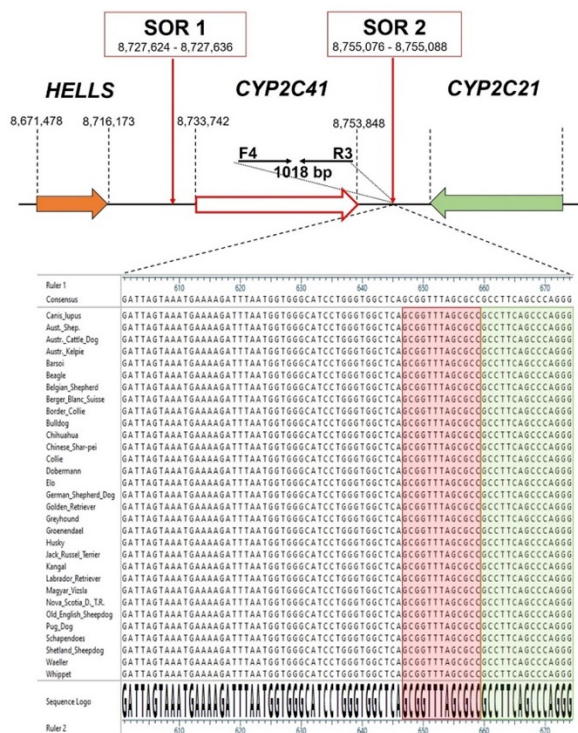

(C) CYP2C41 negative dogs

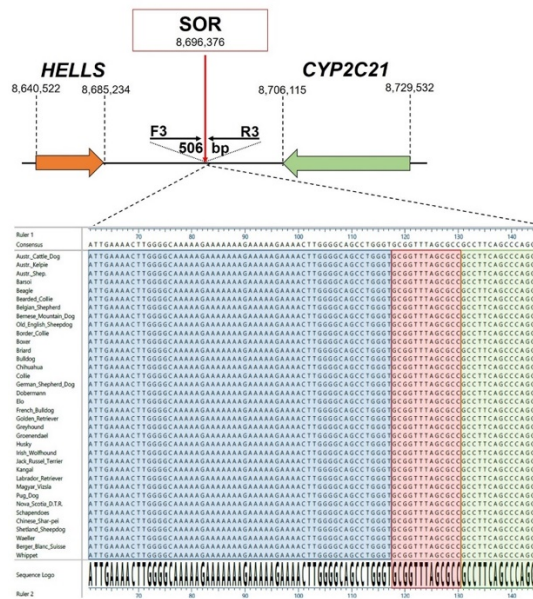

## Supplementary Figure 1

Multiple sequence alignments at the sites of recombination, being SOR1 (A) and SOR2 (B) of CYP2C41 positive dogs as well as SOR (C) of CYP2C41 negative dogs. Respective PCR fragments were amplified with the primer combinations F3/R4 (SOR 1), F4/R3 (SOR 2), or F3/R3 (SOR) and subjected to DNA sequencing. Individual sequencing data were aligned with the MegAlign tool of the DNASTAR software. Conserved sequences at the break points are marked in red (see also **Figure 1C**) and the upstream and downstream regions were highlighted in blue and green, respectively. In addition, the exact positions of the respective gene segments are indicated. The sequence from a CYP2C41 positive gray wolf (*Canis lupus*, GenBank sequence HG994413.1) was included for comparison.

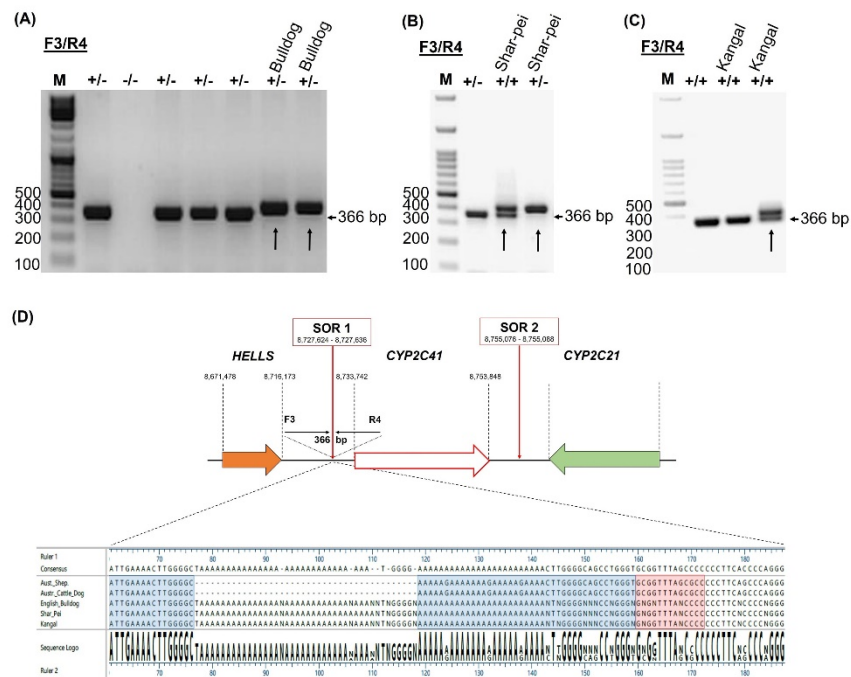

## Supplementary Figure 2

Sequence variation of individual CYP2C41 positive dogs upstream of the site of recombination 1 (SOR1). The CYP2C41 genotype is indicated as follows: (-/-), genotype with two mutant alleles, homozygous for the CYP2C41 deletion; (+/-), genotype with one CYP2C41 allele and one mutant allele, heterozygous for the CYP2C41 deletion; (+/+), genotype with two copies of the CYP2C41 gene. PCR fragments were amplified with the primer combination F3/R4 and visualized on 2% agarose gels. Band shifts indicate sequence variations of individual Bulldog **(A)**, Shar-Pei **(B)**, and Kangal dogs **(C)**. M, molecular weight marker. **(D)** After DNA sequencing, individual sequences were aligned with the MegAlign tool of the DNASTAR software. Conserved sequences at SOR 1 are marked in red (see also **Supplementary Figure 1A**). Individual dogs revealed sequence insertions upstream of the break point of SOR1.
